# Supplementary material
Source: PubMed Central journal article supplement (PMC4402737)
Supplement: ijcem0008-1611-f3.pdf [file ijcem0008-1611-f3.pdf]

Tendency for age-specific mortality with hypertension in Europe

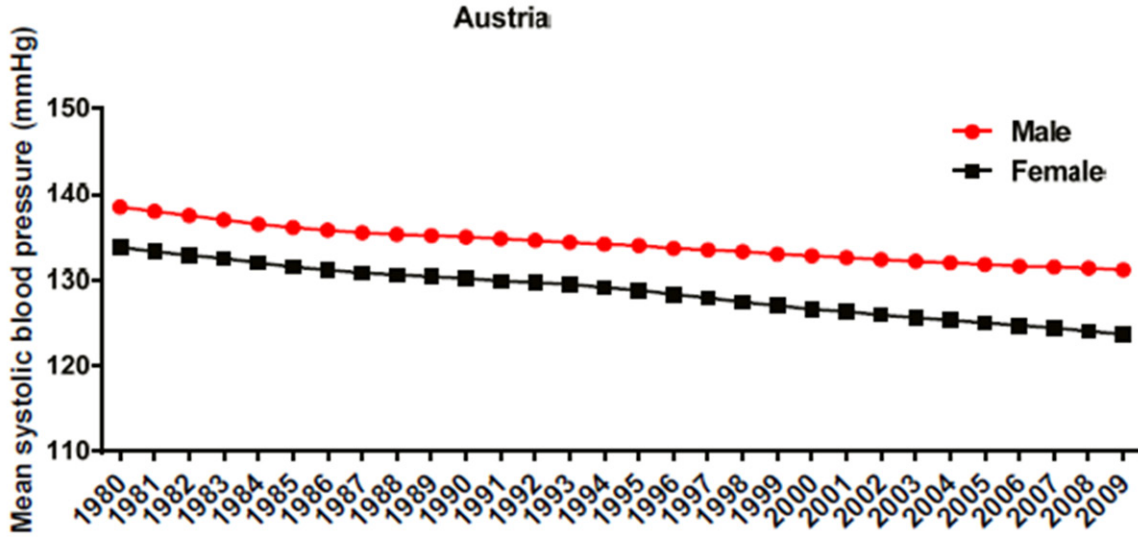

Supplemental Figure 1. SBP trend in Austria from 1980 to 2009. Mean systolic blood pressure (mmHg).

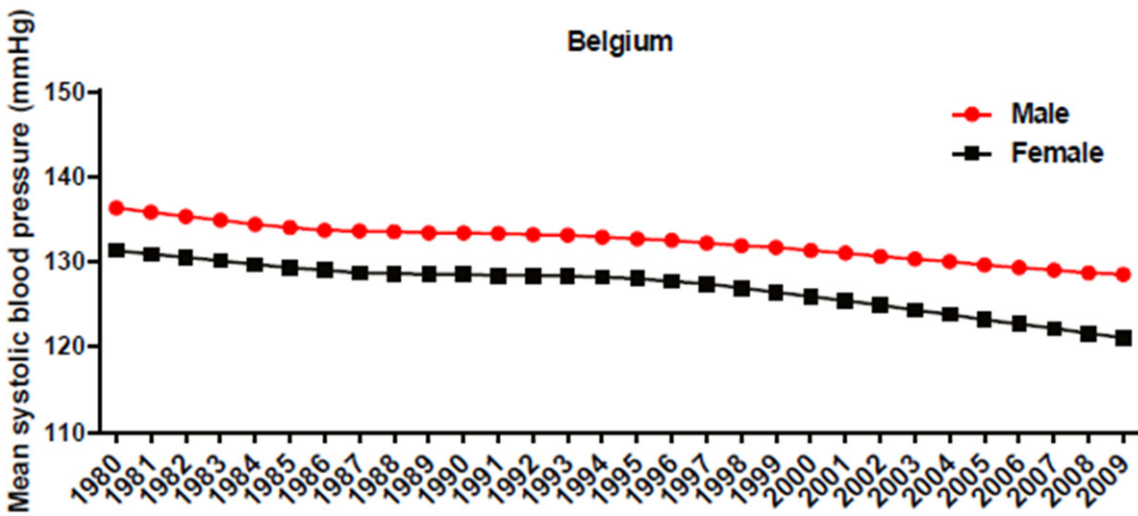

Supplemental Figure 2. SBP trend in Belgium from 1980 to 2009. Mean systolic blood pressure (mmHg).

Tendency for age-specific mortality with hypertension in Europe

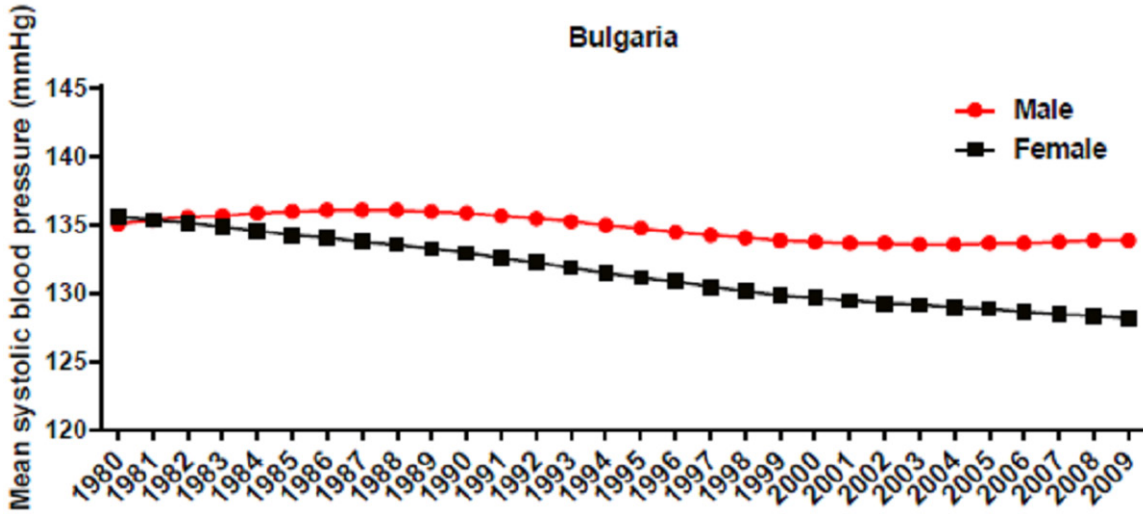

Supplemental Figure 3. SBP trend in Bulgaria from 1980 to 2009. Mean systolic blood pressure (mmHg).

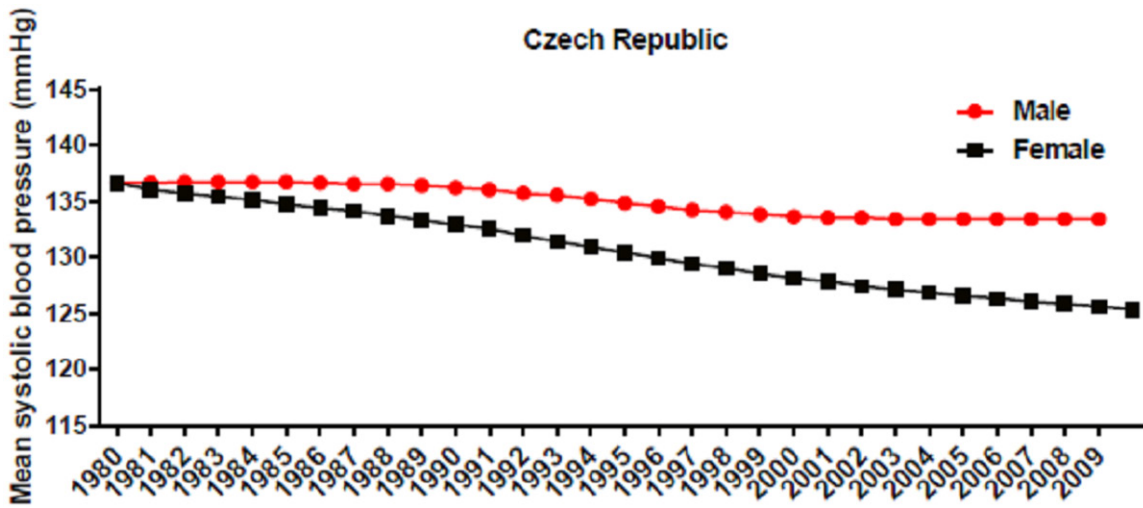

Supplemental Figure 4. SBP trend in Czech Republic from 1980 to 2009. Mean systolic blood pressure (mmHg).

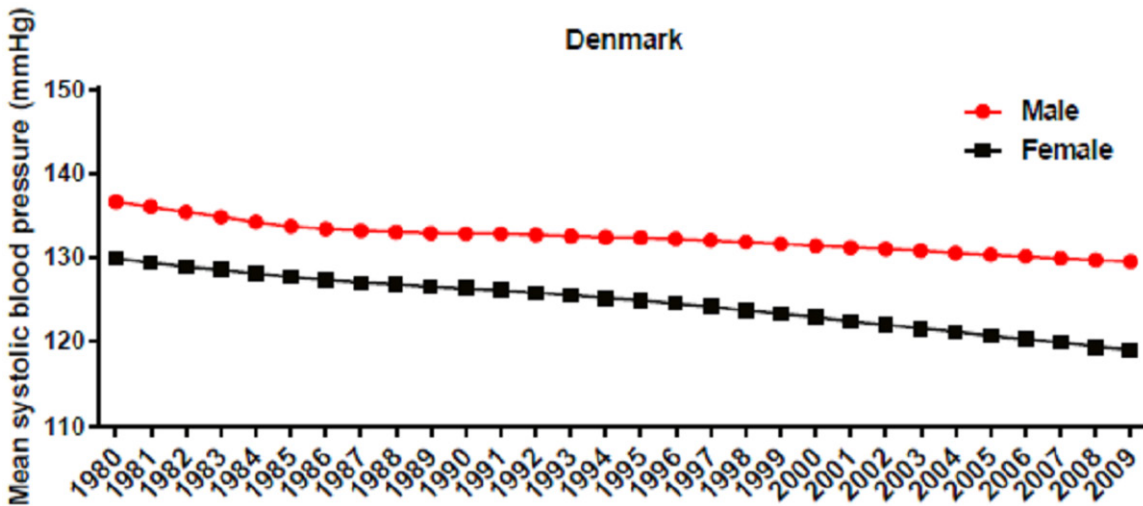

# Tendency for age-specific mortality with hypertension in Europe

Supplemental Figure 5. SBP trend in Denmark from 1980 to 2009. Mean systolic blood pressure (mmHg).

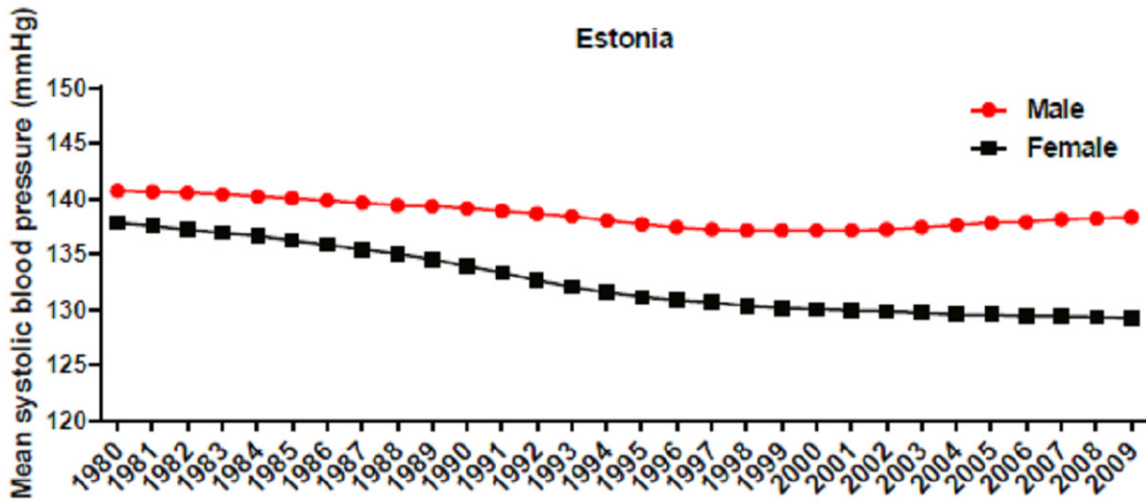

Supplemental Figure 6. SBP trend in Estonia from 1980 to 2009. Mean systolic blood pressure (mmHg).

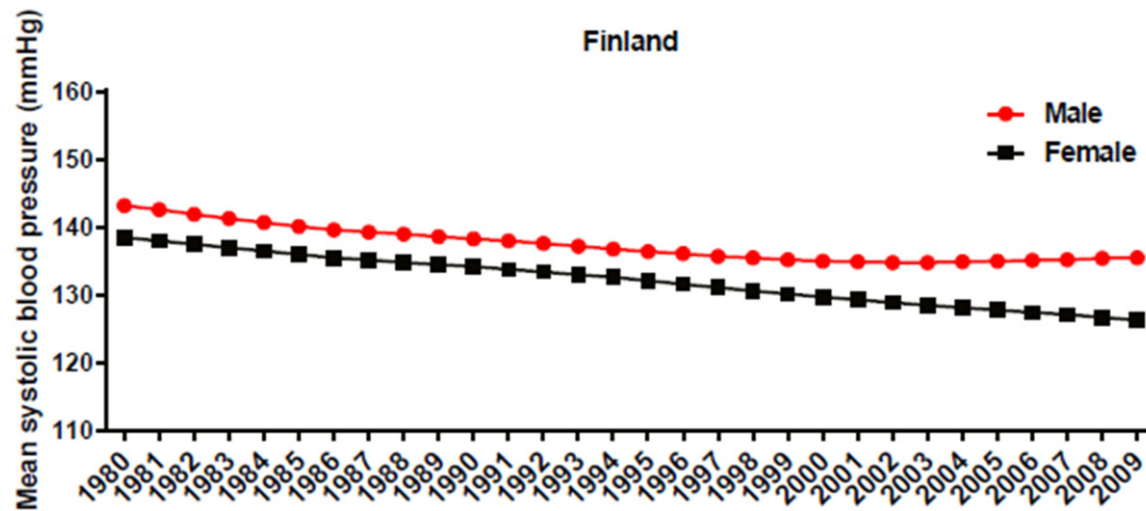

Supplemental Figure 7. SBP trend in Finland from 1980 to 2009. Mean systolic blood pressure (mmHg).

Tendency for age-specific mortality with hypertension in Europe

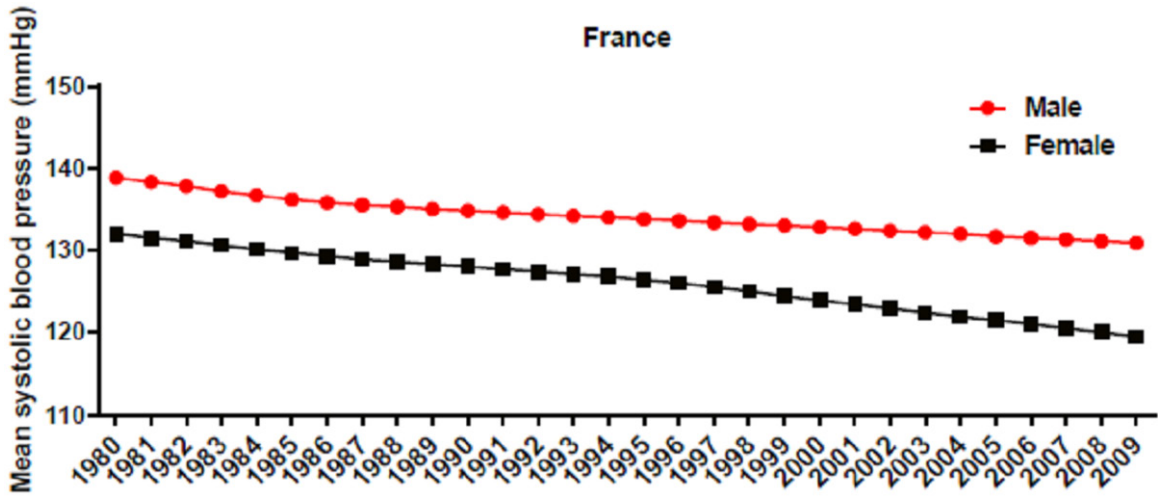

Supplemental Figure 8. SBP trend in France from 1980 to 2009. Mean systolic blood pressure (mmHg).

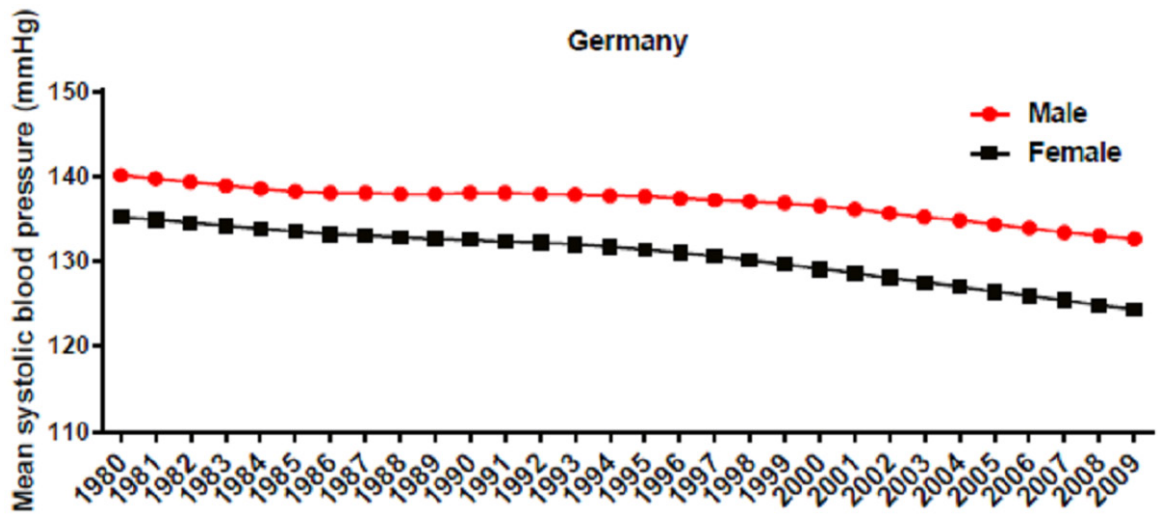

Supplemental Figure 9. SBP trend in Germany from 1980 to 2009. Mean systolic blood pressure (mmHg).

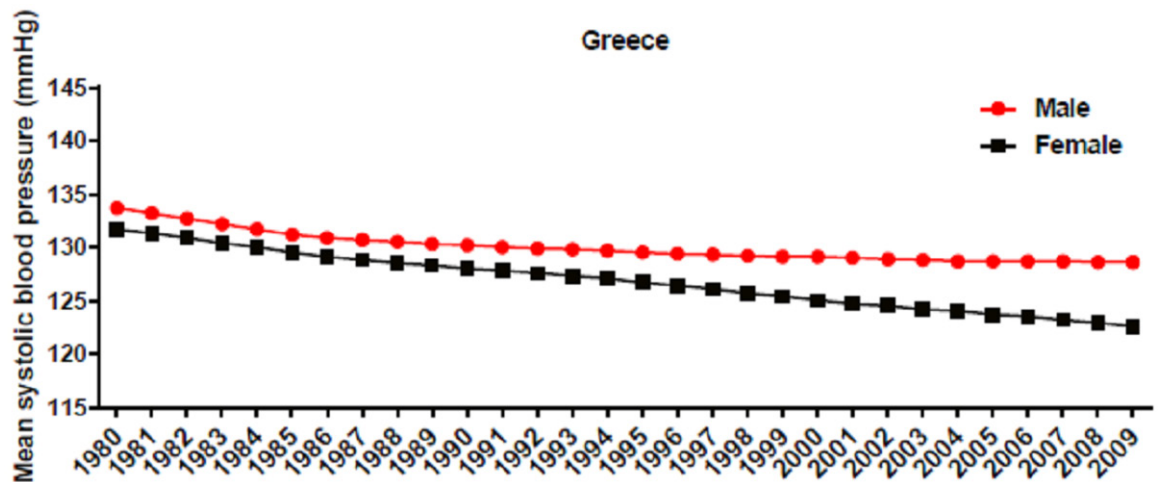

# Tendency for age-specific mortality with hypertension in Europe

Supplemental Figure 10. SBP trend in Greece from 1980 to 2009. Mean systolic blood pressure (mmHg).

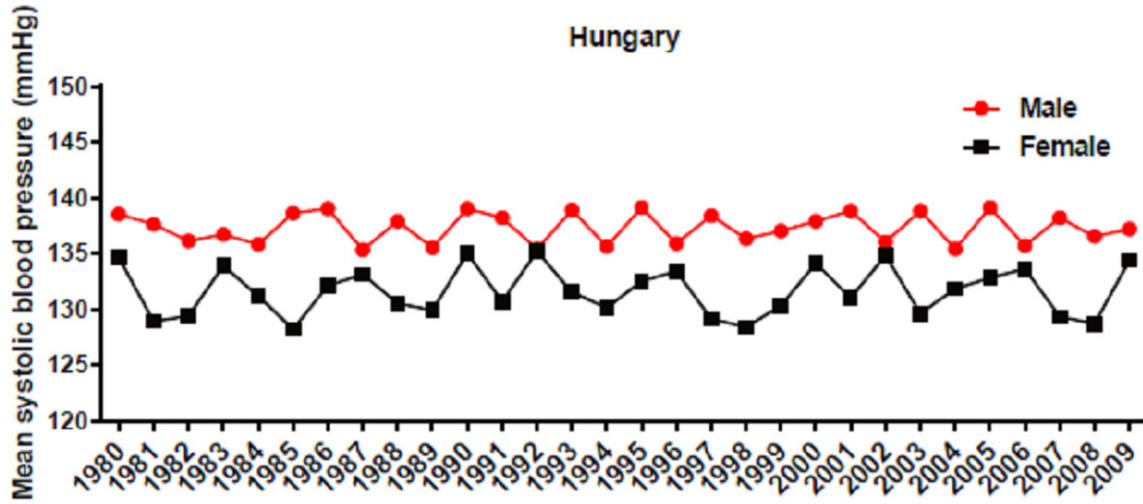

Supplemental Figure 11. SBP trend in Hungary from 1980 to 2009. Mean systolic blood pressure (mmHg).

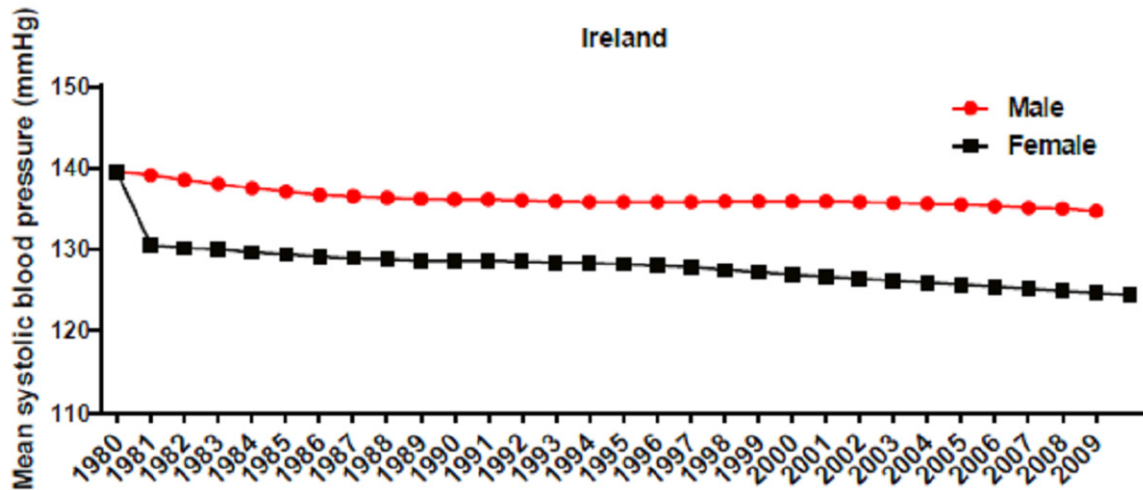

Supplemental Figure 12. SBP trend in Ireland from 1980 to 2009. Mean systolic blood pressure (mmHg).

Tendency for age-specific mortality with hypertension in Europe

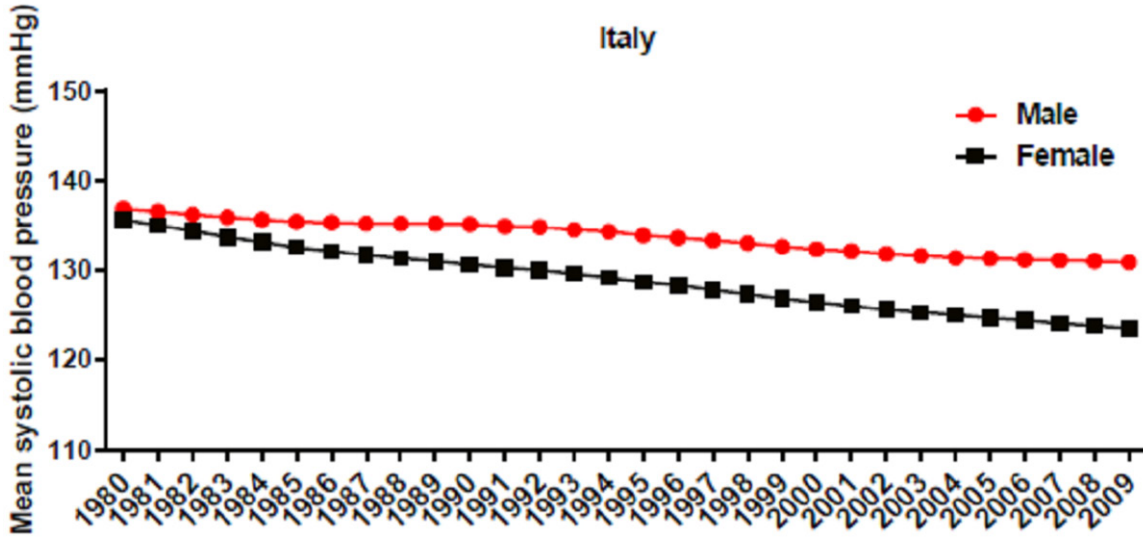

Supplemental Figure 13. SBP trend in Italy from 1980 to 2009. Mean systolic blood pressure (mmHg).

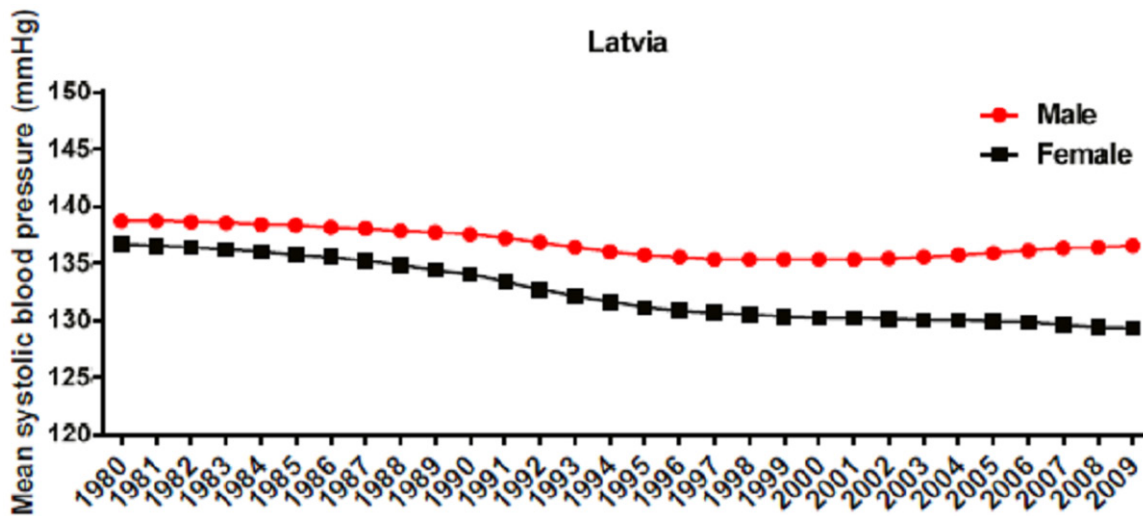

Supplemental Figure 14. SBP trend in Latvia from 1980 to 2009. Mean systolic blood pressure (mmHg).

Tendency for age-specific mortality with hypertension in Europe

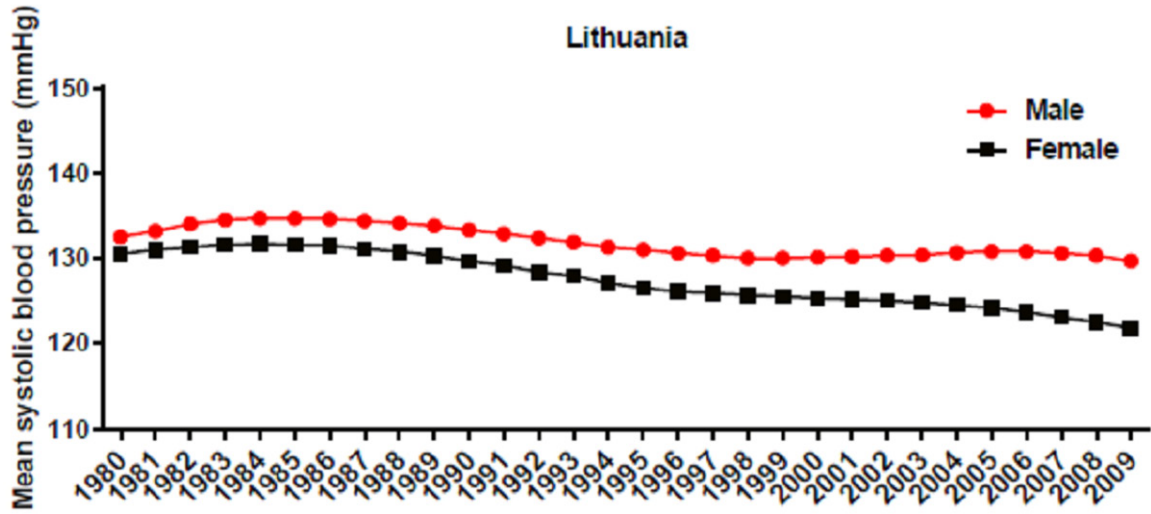

Supplemental Figure 15. SBP trend in Lithuania from 1980 to 2009. Mean systolic blood pressure (mmHg).

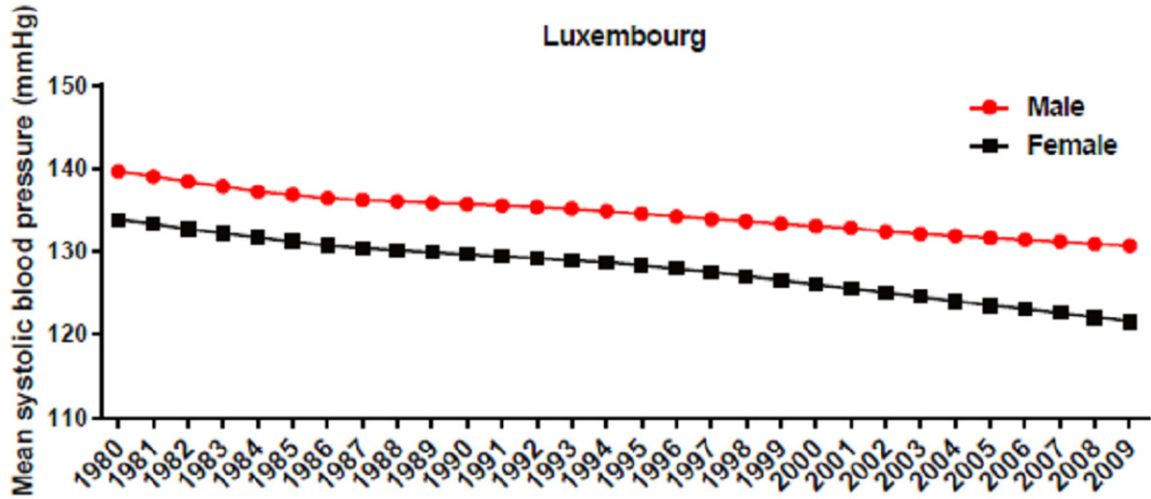

Supplemental Figure 16. SBP trend in Luxembourg from 1980 to 2009. Mean systolic blood pressure (mmHg).

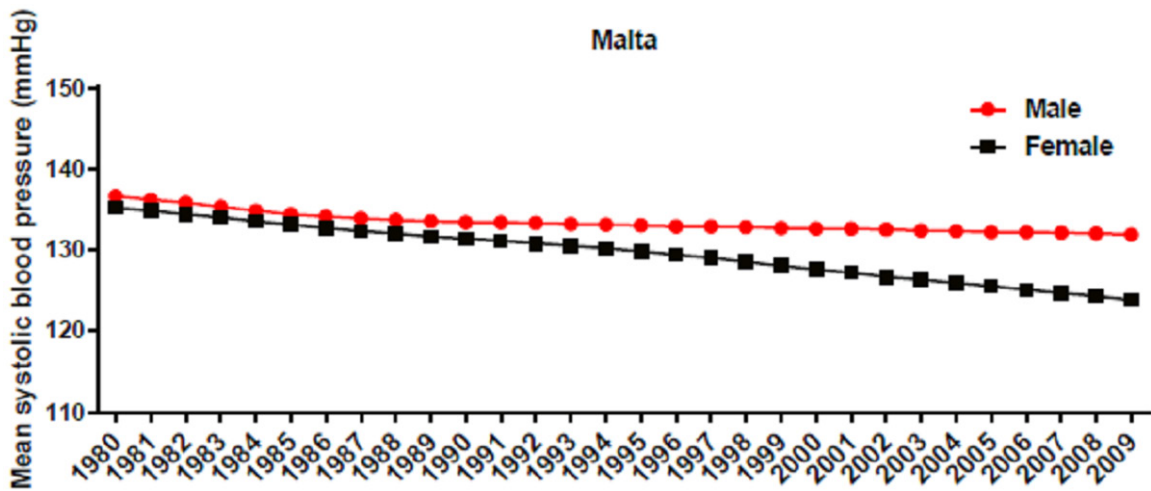

## Tendency for age-specific mortality with hypertension in Europe

Supplemental Figure 17. SBP trend in Malta from 1980 to 2009. Mean systolic blood pressure (mmHg).

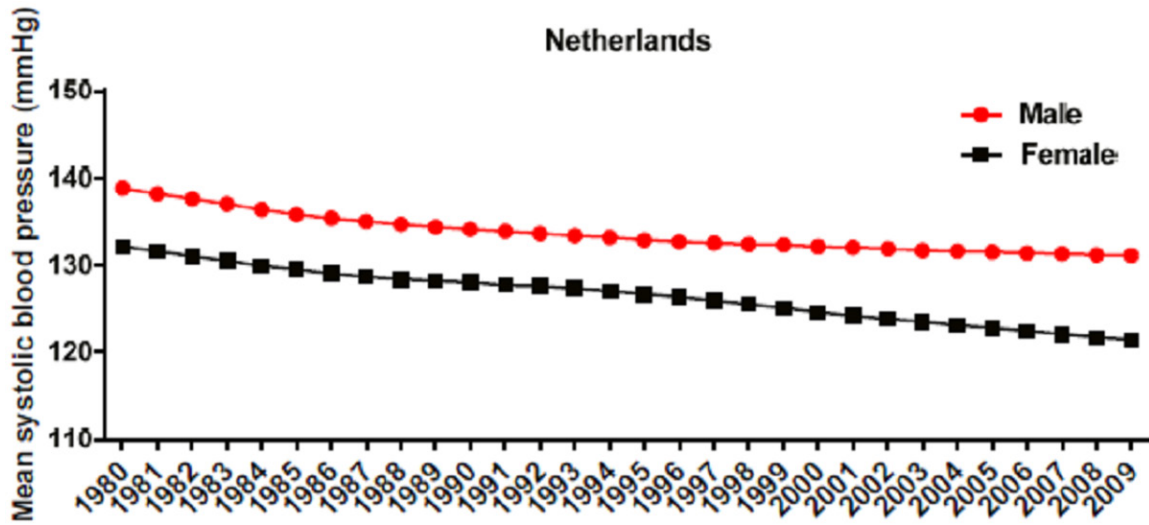

Supplemental Figure 18. SBP trend in Netherlands from 1980 to 2009. Mean systolic blood pressure (mmHg).

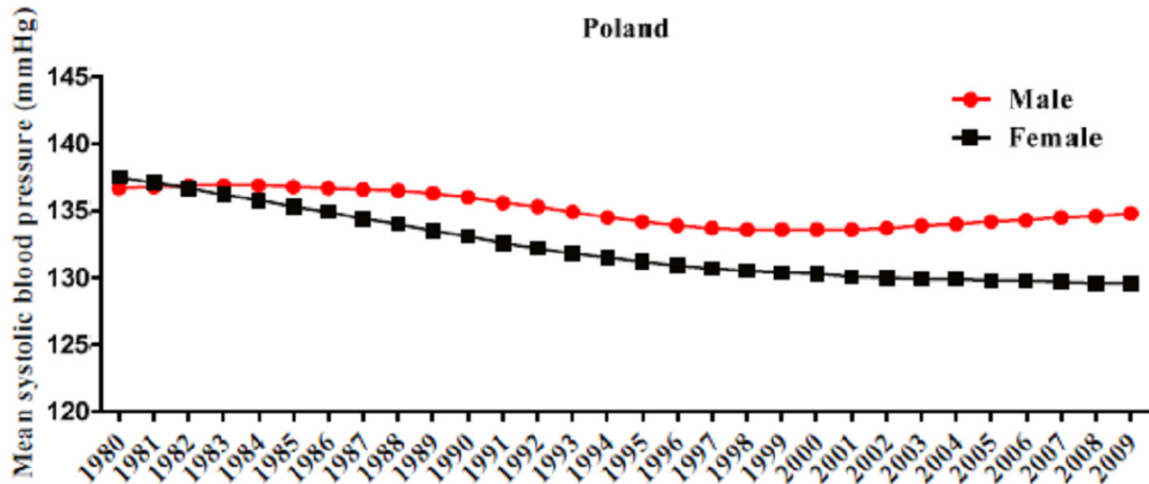

Supplemental Figure 19. SBP trend in Poland from 1980 to 2009. Mean systolic blood pressure (mmHg).



Tendency for age-specific mortality with hypertension in Europe

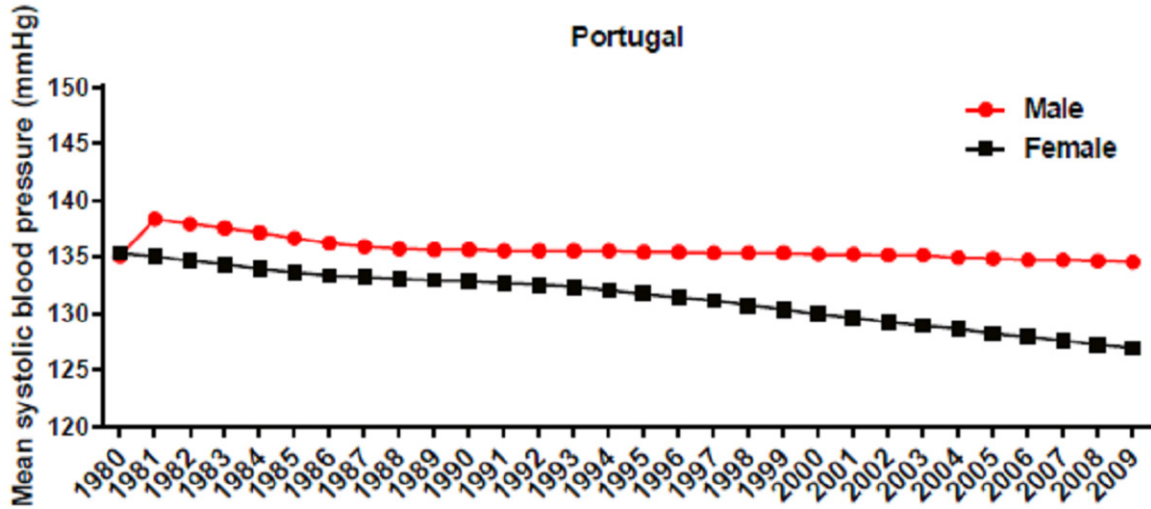

Supplemental Figure 20. SBP trend in Portugal from 1980 to 2009. Mean systolic blood pressure (mmHg).

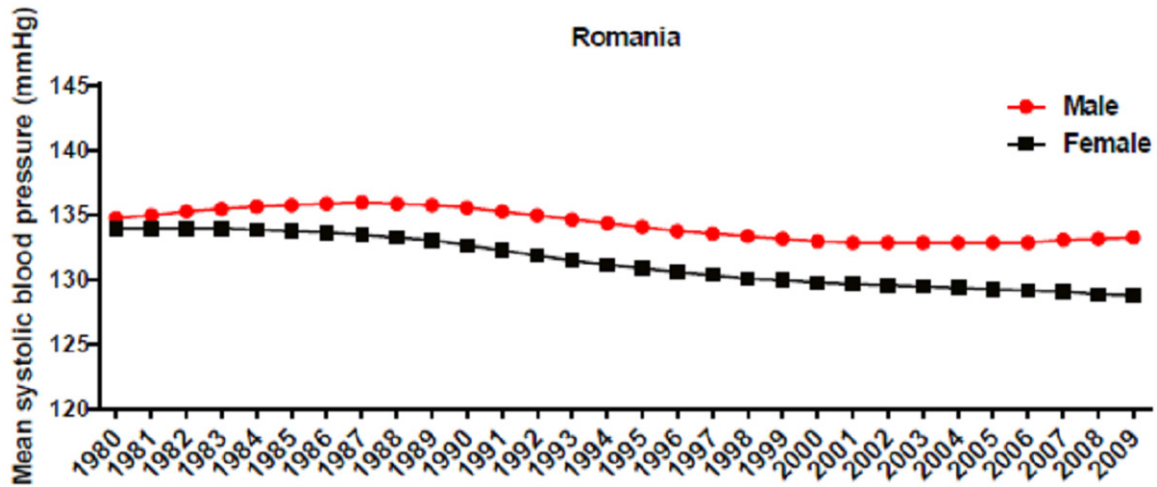

Supplemental Figure 21. SBP trend in Romania from 1980 to 2009. Mean systolic blood pressure (mmHg).

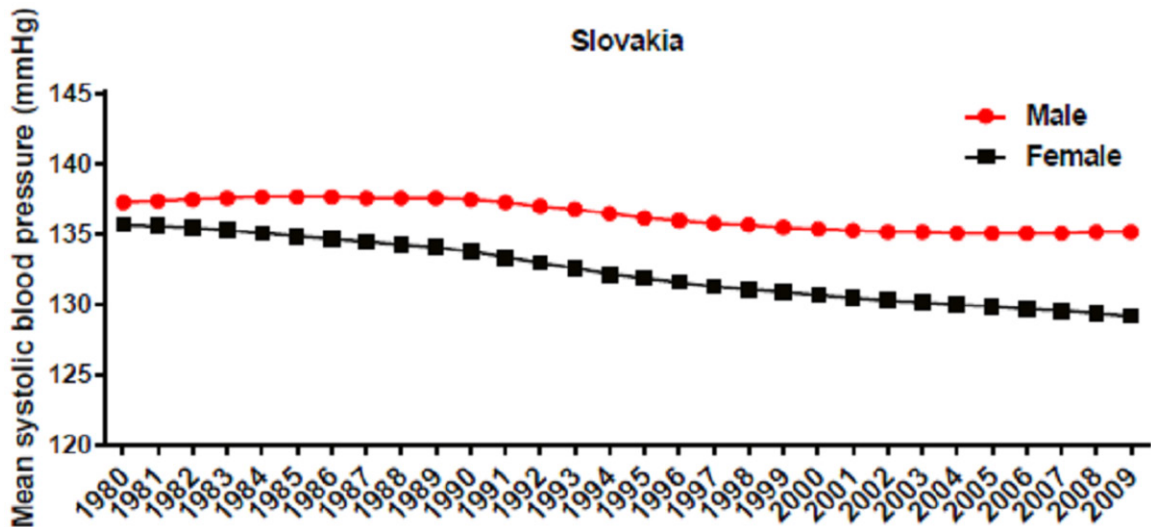

## Tendency for age-specific mortality with hypertension in Europe

Supplemental Figure 22. SBP trend in Slovakia from 1980 to 2009. Mean systolic blood pressure (mmHg).

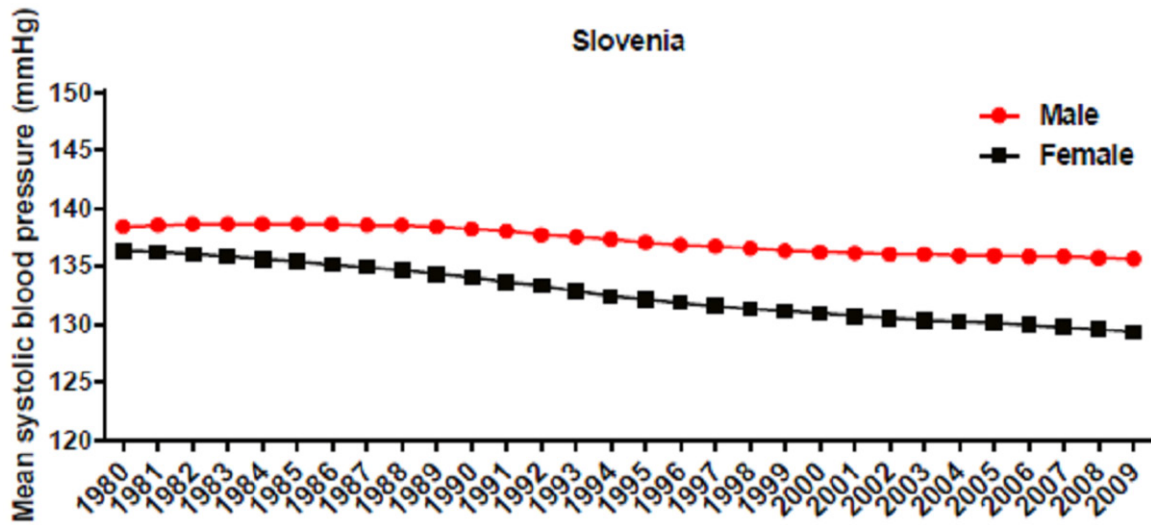

Supplemental Figure 23. SBP trend in Slovenia from 1980 to 2009. Mean systolic blood pressure (mmHg).

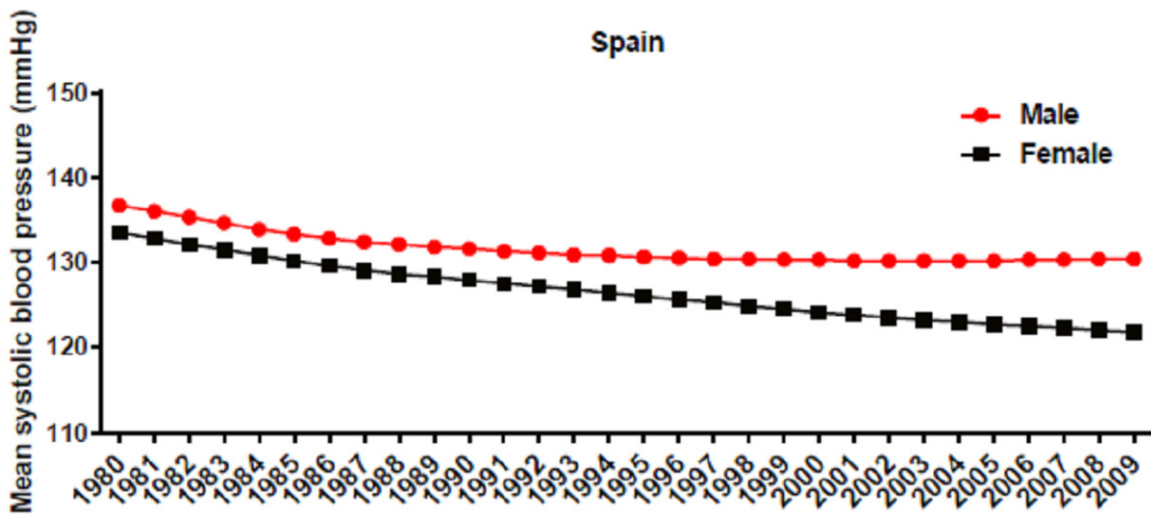

Supplemental Figure 24. SBP trend in Spain from 1980 to 2009. Mean systolic blood pressure (mmHg).

Tendency for age-specific mortality with hypertension in Europe

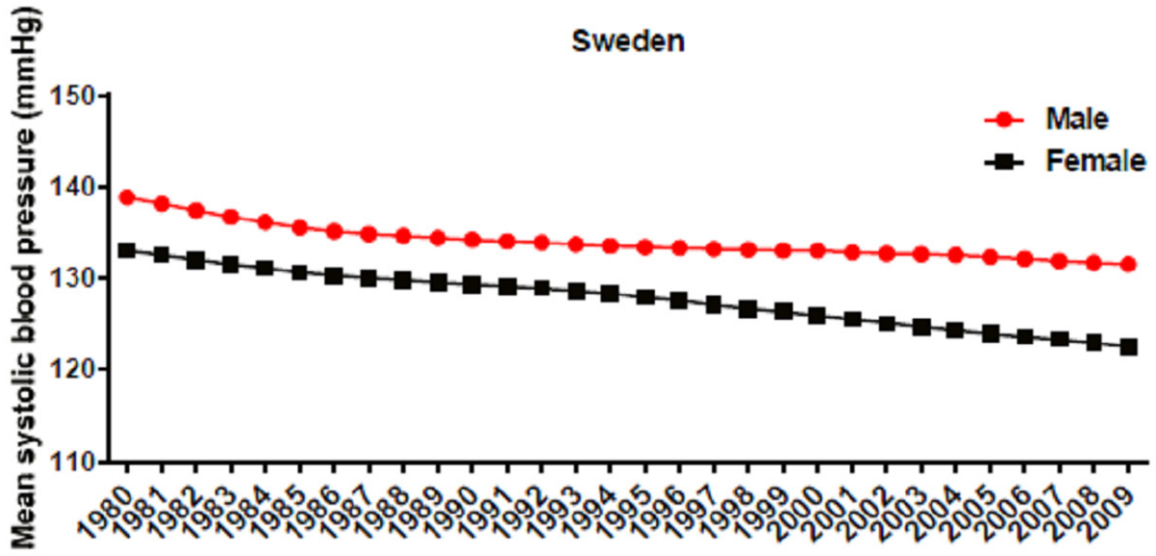

Supplemental Figure 25. SBP trend in Sweden from 1980 to 2009. Mean systolic blood pressure (mmHg).

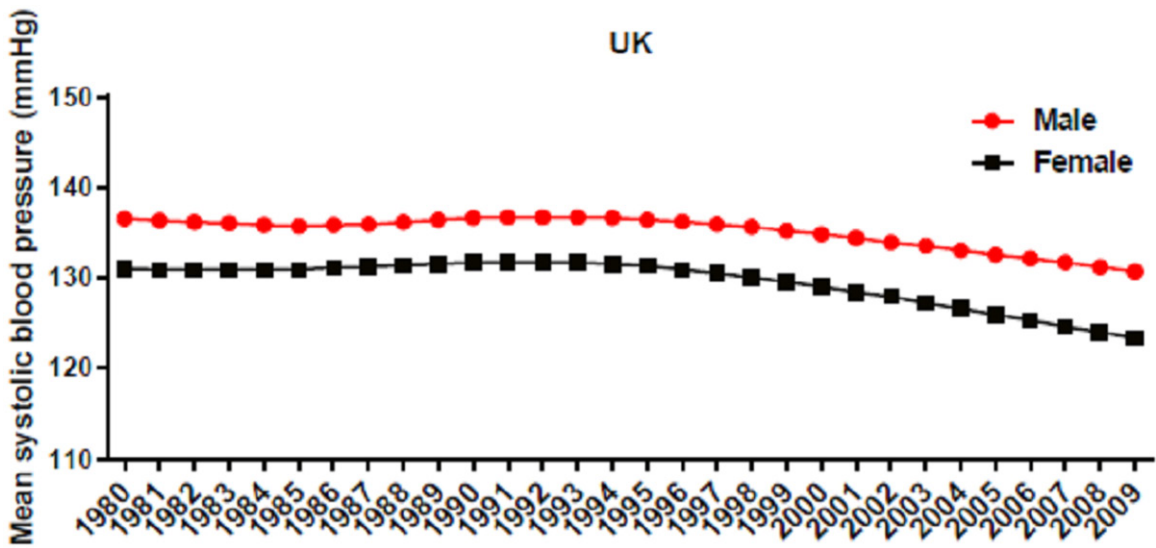

Supplemental Figure 26. SBP trend in UK from 1980 to 2009. Mean systolic blood pressure (mmHg).
